# Supplementary material for: The relation between systemic inflammation and incident cancer in patients with stable cardiovascular disease: a cohort study
Source: PubMed Central journal article supplement — Eur Heart J. 2019 Sep 1;40(48):3901–9. doi: 10.1093/eurheartj/ehz587 (PMC6925382; doi:10.1093/eurheartj/ehz587), 2019-09-01
Supplement: ehz587_supplementary_material.pdf [file ehz587_supplementary_material.pdf]

## **Supplemental material**

### **Relation between systemic inflammation and incident cancer in patients with stable cardiovascular disease**

*Authors: Cilie C. van 't Klooster, Paul M. Ridker, Jesper Hjortnaes, Yolanda van der Graaf, Folkert W. Asselbergs, Jan Westerink, Joachim G.J.V. Aerts, Frank L.J. Visseren*

**Supplemental Table S1.** Cancer diagnosis according to ICD-10 classification

| <b>Cancer group</b>        | <b>Topography</b>                                            | <b>Number</b> | <b>ICD-10 code</b> |
|----------------------------|--------------------------------------------------------------|---------------|--------------------|
| Colon/rectum               | Colon, rectum                                                | 177           | C18-C20            |
| Lung                       | Lung, bronchus                                               | 226           | C34                |
| Breast                     | Breast                                                       | 70            | C50                |
| Prostate                   | Prostate                                                     | 188           | C61                |
| Urinary tract              | Kidney, renal pelvis, ureter                                 | 52            | C64-C66            |
|                            | Bladder, or unspecified parts of urinary organs              | 57            | C67-C68            |
| Lymphoid/<br>hematopoietic | Hodgkin's disease                                            | 1             | C81                |
|                            | Non-Hodgkin's lymphoma                                       | 30            | C82-C85            |
|                            | Multiple myeloma                                             | 19            | C88, C90           |
|                            | Leukemia                                                     | 32            | C91-C96            |
| Melanoma skin cancer       | Melanoma of skin                                             | 52            | C43                |
| Other                      | Lip, oral cavity, pharynx                                    | 31            | C00-C14            |
|                            | Esophagus                                                    | 36            | C15                |
|                            | Stomach                                                      | 38            | C16                |
|                            | Small intestine                                              | 6             | C17                |
|                            | Liver and bile ducts, gallbladder                            | 21            | C22-C24, C26.9     |
|                            | Pancreas                                                     | 34            | C25                |
|                            | Nasal cavity, middle ear, accessory sinuses, larynx, trachea | 26            | C30-C33            |
|                            | Bone and articular cartilage of limb                         | 1             | C40-C41            |
|                            | Mesothelial and soft tissue                                  | 20            | C45-C49            |
|                            | Vulva or vagina                                              | 5             | C51-C52            |
|                            | Cervix uteri or corpus uteri                                 | 14            | C53-C54            |
|                            | Ovarium                                                      | 5             | C56-C57            |
|                            | Penis or testis                                              | 5             | C60,C62-C63        |
|                            | Eye, brain, and other parts of central nervous system        | 8             | C69-C72            |
|                            | Thyroid gland                                                | 3             | C73                |
|                            | Ill-defined, secondary and unspecified sites                 | 22            | C76-C80            |

**Supplemental Table S2.** Tumor histopathology according to ICD-O-3 classification

| <b>Histopathology according to ICD-O-3 code</b>               | <b>Number</b> |
|---------------------------------------------------------------|---------------|
| 800 Neoplasms, not further specified                          | 60            |
| 801-804 Epithelial neoplasms, not further specified           | 83            |
| 805-808 Squamous cell neoplasms                               | 117           |
| 809-811 Basal cell neoplasms                                  | 1             |
| 812-813 Papillomas and transitional cell carcinomas           | 61            |
| 814-838 Adenomas and adenocarcinomas                          | 568           |
| 843 Mucoepidermoid neoplasms                                  | 1             |
| 844-849 Cystic, mucinous and serous neoplasms                 | 42            |
| 850-854 Ductal and lobular neoplasms                          | 79            |
| 855 Acinar cell neoplasms                                     | 9             |
| 856-857 Complex epithelial neoplasms                          | 1             |
| 872-879 Nevi and melanomas                                    | 55            |
| 880 Tumors of soft tissue and sarcomas, not further specified | 2             |
| 881-883 Fibrous neoplasms                                     | 1             |
| 885-888 Lipomatous neoplasms                                  | 1             |
| 889-892 Myxomatous neoplasms                                  | 2             |
| 893-899 Complex mixed and stromal neoplasms                   | 4             |
| 905 Mesothelial neoplasms                                     | 11            |
| 906-909 Germ cell neoplasms                                   | 3             |
| 912-916 Tumors of blood vessels                               | 1             |
| 918-924 Neoplasms of bone and cartilage                       | 1             |
| 938-948 Gliomas                                               | 4             |
| 949-952 Neuroepithelial neoplasms                             | 1             |
| 959-972 Hodgkin lymphomas and non-Hodgkin lymphomas           | 33            |
| 973 Plasma cell tumors                                        | 15            |
| 976 Immunoproliferative diseases                              | 1             |
| 980-994 Leukemias                                             | 32            |
| 998 Myelodysplastic syndrome                                  | 1             |

**Supplemental Table S3.** Definitions of endpoint recurrent cardiovascular disease

| <b>Cardiovascular disease</b> | <b>Definition</b>                                                                                                                                       |
|-------------------------------|---------------------------------------------------------------------------------------------------------------------------------------------------------|
| Myocardial infarction         | Myocardial infarction, fatal or non-fatal                                                                                                               |
| Stroke                        | Cerebral infarction, fatal or non-fatal<br>Intracranial hemorrhage, fatal or non-fatal<br>Fatal stroke, undefined hemorrhage/infarction                 |
| Vascular mortality            | Fatal stroke<br>Fatal myocardial infarction<br>Terminal heart failure<br>Fatal rupture aneurysm abdominal aorta<br>Sudden death<br>Other vascular death |
| Cardiovascular disease        | Any of the above                                                                                                                                        |

**Supplemental Figure S1.** Relation between CRP and recurrent cardiovascular disease risk.

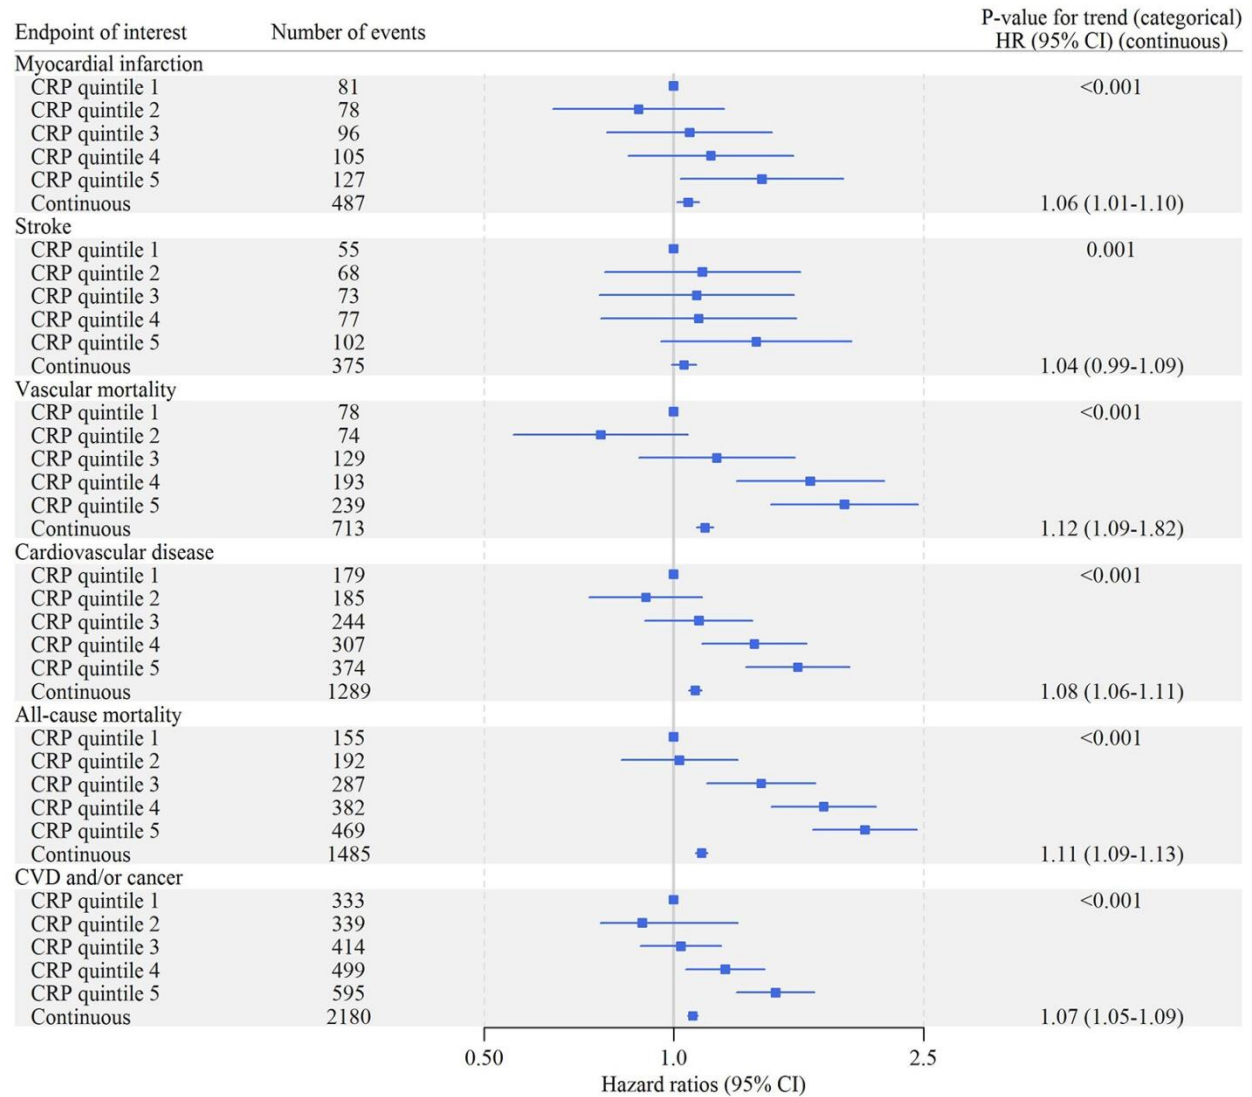

Cardiovascular disease is defined as the occurrence of myocardial infarction, stroke, or vascular mortality. Models are adjusted for age, sex, smoking status, number of pack-years, body mass index, LDL cholesterol, diabetes mellitus, systolic blood pressure, and kidney function. Continuous analyses represent hazard ratios per 1 mg/L higher CRP concentration.

**Supplemental Table S4.** Relation between continuous CRP (1 mg/L higher) and risk of all lung cancers and for different histopathological diagnoses

| <b>Lung cancer<br/>Histopathological diagnosis</b>                                                        | <b>HR (95% CI)</b>      |
|-----------------------------------------------------------------------------------------------------------|-------------------------|
| <b>All lung cancers</b>                                                                                   |                         |
| Number of events                                                                                          | 226                     |
| Model 1                                                                                                   | <b>1.20 (1.15-1.26)</b> |
| Model 2                                                                                                   | <b>1.16 (1.10-1.22)</b> |
| <b>Small cell lung cancer (SCLC)</b>                                                                      |                         |
| Number of events                                                                                          | 33                      |
| Model 1                                                                                                   | <b>1.25 (1.11-1.42)</b> |
| Model 2                                                                                                   | <b>1.23 (1.08-1.40)</b> |
| <b>Non-small cell lung cancer (NSCLC)<br/>(including adeno-, squamous cell, and large cell carcinoma)</b> |                         |
| Number of events                                                                                          | 164                     |
| Model 1                                                                                                   | <b>1.19 (1.12-1.26)</b> |
| Model 2                                                                                                   | <b>1.18 (1.11-1.25)</b> |
| <b>Adenocarcinoma</b>                                                                                     |                         |
| Number of events                                                                                          | 85                      |
| Model 1                                                                                                   | <b>1.19 (1.10-1.29)</b> |
| Model 2                                                                                                   | <b>1.19 (1.09-1.29)</b> |
| <b>Squamous cell carcinoma</b>                                                                            |                         |
| Number of events                                                                                          | 47                      |
| Model 1                                                                                                   | <b>1.20 (1.08-1.33)</b> |
| Model 2                                                                                                   | <b>1.19 (1.07-1.33)</b> |
| <b>Large cell carcinoma</b>                                                                               |                         |
| Number of events                                                                                          | 29                      |
| Model 1                                                                                                   | <b>1.18 (1.03-1.36)</b> |
| Model 2                                                                                                   | 1.15 (0.99-1.33)        |

Model 1= Adjusted for age, sex; Model 2= Adjusted for age, sex, number of pack-years, body mass index, LDL cholesterol, diabetes mellitus, systolic blood pressure, and kidney function. No adjustment for smoking status due to low number of lung cancer in non-smokers. HR=Hazard ratio; CI=confidence interval.

The relatively high percentage of large cell undifferentiated NSCLC is related to the fact that the SMART cohort started in 1996 and histopathological subdivision of NSCLC was not routinely determined yet.

**Supplemental Figure S2.** Relation between continuous CRP and incident cancer according to histopathology, irrespective of anatomical location of origin.

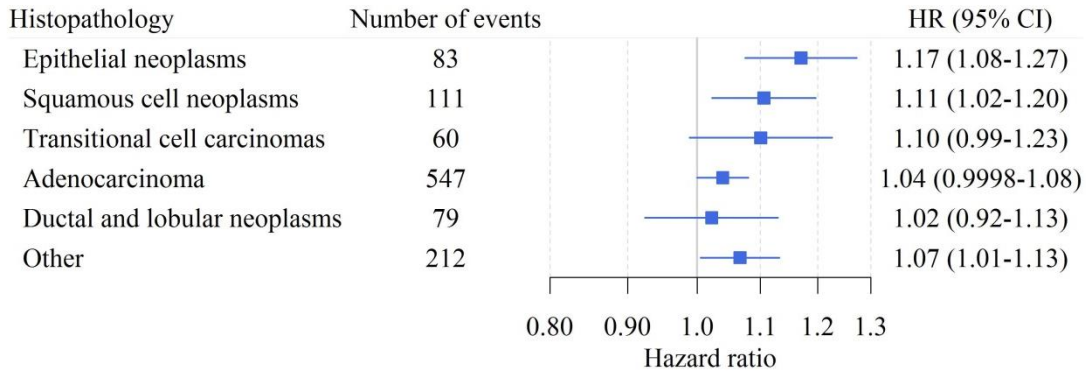

Hazard ratios are adjusted for age, sex, smoking status, number of pack-years, body mass index, LDL cholesterol, diabetes mellitus, systolic blood pressure, and kidney function. Category other includes basal cell neoplasms, mucoepidermoid neoplasms, cystic, mucinous, and serous neoplasms, acinar cell neoplasms, fibrous neoplasms, lipomatous neoplasms, myxomatous neoplasms, complex mixed and stromal neoplasms, mesothelial neoplasms, germ cell neoplasms, tumors of blood vessels, bone and cartilage neoplasms, gliomas, neuroepithelial neoplasms, Hodgkin lymphomas and non-Hodgkin lymphomas, plasma cell neoplasms, leukemias, and myelodysplastic syndrome (Supplemental material Table S2).

**Supplemental Table S5.** Relation between continuous CRP (1 mg/L higher) and cancer risk, for all cancers and according to anatomical location, with separate adjustment for BMI and smoking.

| <b>Endpoint of interest</b>         | <b>HR (95% CI)</b>      |
|-------------------------------------|-------------------------|
| <b>Lung</b>                         |                         |
| Number of events                    | 226                     |
| Model 1                             | <b>1.20 (1.15-1.26)</b> |
| Model 1b (smoking adjusted)         | <b>1.14 (1.09-1.20)</b> |
| Model 1c (body mass index adjusted) | <b>1.22 (1.16-1.28)</b> |
| Model 2                             | <b>1.16 (1.10-1.22)</b> |
| <b>Colon/rectum</b>                 |                         |
| Number of events                    | 177                     |
| Model 1                             | <b>1.06 (1.00-1.13)</b> |
| Model 1b (smoking adjusted)         | 1.05 (0.99-1.12)        |
| Model 1c (body mass index adjusted) | 1.06 (0.995-1.13)       |
| Model 2                             | 1.05 (0.98-1.12)        |
| <b>Urinary tract</b>                |                         |
| Number of events                    | 107                     |
| Model 1                             | <b>1.10 (1.02-1.19)</b> |
| Model 1b (smoking adjusted)         | 1.08 (0.997-1.17)       |
| Model 1c (body mass index adjusted) | <b>1.10 (1.01-1.19)</b> |
| Model 2                             | 1.08 (0.995-1.17)       |
| <b>Lymphoid/hematopoietic</b>       |                         |
| Number of events                    | 82                      |
| Model 1                             | <b>1.11 (1.01-1.21)</b> |
| Model 1b (smoking adjusted)         | <b>1.11 (1.02-1.21)</b> |
| Model 1c (body mass index adjusted) | <b>1.11 (1.02-1.21)</b> |
| Model 2                             | <b>1.12 (1.02-1.22)</b> |
| <b>Breast</b>                       |                         |
| Number of events/females            | 69/1828                 |
| Model 1                             | 1.04 (0.94-1.15)        |
| Model 1b (smoking adjusted)         | 1.05 (0.95-1.16)        |
| Model 1c (body mass index adjusted) | 1.05 (0.95-1.16)        |
| Model 2                             | 1.06 (0.96-1.17)        |
| <b>Prostate</b>                     |                         |
| Number of events/males              | 188/5350                |
| Model 1                             | 0.95 (0.89-1.02)        |
| Model 1b (smoking adjusted)         | 0.95 (0.89-1.03)        |
| Model 1c (body mass index adjusted) | 0.96 (0.89-1.03)        |
| Model 2                             | 0.96 (0.89-1.03)        |
| <b>All cancers</b>                  |                         |
| Number of events                    | 1072                    |
| Model 1                             | <b>1.08 (1.05-1.11)</b> |
| Model 1b (smoking adjusted)         | <b>1.06 (1.03-1.09)</b> |
| Model 1c (body mass index adjusted) | <b>1.08 (1.06-1.11)</b> |
| Model 2                             | <b>1.07 (1.04-1.09)</b> |

Model 1= Adjusted for age, sex; Model 1b= Adjusted for age, sex, smoking status, and pack-years of smoking. Model 1c= Adjusted for age, sex, and body mass index. Model 2= Adjusted for age, sex, smoking status, number of pack-years, body mass index, LDL cholesterol, diabetes mellitus, systolic blood pressure, and kidney function. HR=Hazard ratio; CI=confidence interval; CVD=cardiovascular disease.



**Supplemental Table S6.** Relation between continuous CRP (1 mg/L higher) and cancer risk, stratified for smoking status.

|                                                                                            | <b>Never smokers</b><br>N= 1587<br>HR (95% CI) | <b>Former smokers</b><br>N=3416<br>HR (95% CI) | <b>Current smokers</b><br>N=2175<br>HR (95% CI) | <b>P-value for interaction</b><br>Former vs never smokers | <b>P value for interaction</b><br>Current vs never smokers |
|--------------------------------------------------------------------------------------------|------------------------------------------------|------------------------------------------------|-------------------------------------------------|-----------------------------------------------------------|------------------------------------------------------------|
| <b>Lung</b>                                                                                |                                                |                                                |                                                 |                                                           |                                                            |
| Number of events                                                                           | 9                                              | 93                                             | 124                                             |                                                           |                                                            |
| Model 1                                                                                    | 1.18 (0.91-1.53)                               | <b>1.28 (1.19-1.37)</b>                        | 1.06 (0.99-1.14)                                |                                                           |                                                            |
| Model 2                                                                                    | 1.16 (0.88-1.53)                               | <b>1.26 (1.16-1.36)</b>                        | <b>1.08 (1.01-1.16)</b>                         | 0.51                                                      | 0.56                                                       |
| <b>Colon/rectum</b>                                                                        |                                                |                                                |                                                 |                                                           |                                                            |
| Number of events                                                                           | 33                                             | 94                                             | 50                                              |                                                           |                                                            |
| Model 1                                                                                    | <b>1.21 (1.06-1.38)</b>                        | 1.07 (0.97-1.16)                               | 0.97 (0.85-1.09)                                |                                                           |                                                            |
| Model 2                                                                                    | <b>1.19 (1.04-1.37)</b>                        | 1.05 (0.95-1.15)                               | 0.95 (0.83-1.08)                                | 0.07                                                      | <b>0.01</b>                                                |
| <b>Urinary tract</b>                                                                       |                                                |                                                |                                                 |                                                           |                                                            |
| Number of events                                                                           | 13                                             | 55                                             | 39                                              |                                                           |                                                            |
| Model 1                                                                                    | 0.87 (0.62-1.22)                               | 1.09 (0.97-1.22)                               | 1.11 (0.98-1.25)                                |                                                           |                                                            |
| Model 2                                                                                    | 0.90 (0.64-1.26)                               | 1.04 (0.92-1.18)                               | 1.12 (0.99-1.26)                                | 0.28                                                      | 0.21                                                       |
| <b>Lymphoid/hematopoietic</b>                                                              |                                                |                                                |                                                 |                                                           |                                                            |
| Number of events                                                                           | 19                                             | 42                                             | 21                                              |                                                           |                                                            |
| Model 1                                                                                    | 0.99 (0.79-1.25)                               | <b>1.19 (1.06-1.33)</b>                        | 1.07 (0.90-1.27)                                |                                                           |                                                            |
| Model 2                                                                                    | 0.94 (0.73-1.21)                               | <b>1.16 (1.03-1.32)</b>                        | 1.09 (0.91-1.29)                                | 0.21                                                      | 0.60                                                       |
| <b>Breast</b>                                                                              |                                                |                                                |                                                 |                                                           |                                                            |
| Number of events/females                                                                   | 23/563                                         | 28/648                                         | 18/617                                          |                                                           |                                                            |
| Model 1                                                                                    | 1.15 (0.97-1.35)                               | 1.03 (0.89-1.20)                               | 0.97 (0.80-1.18)                                |                                                           |                                                            |
| Model 2                                                                                    | 1.16 (0.98-1.38)                               | 1.02 (0.87-1.20)                               | 0.99 (0.81-1.22)                                | 0.40                                                      | 0.22                                                       |
| <b>Prostate</b>                                                                            |                                                |                                                |                                                 |                                                           |                                                            |
| Number of events/males                                                                     | 34/1024                                        | 112/2768                                       | 42/1558                                         |                                                           |                                                            |
| Model 1                                                                                    | 0.85 (0.69-1.07)                               | 0.96 (0.88-1.06)                               | 0.98 (0.86-1.12)                                |                                                           |                                                            |
| Model 2                                                                                    | 0.90 (0.72-1.12)                               | 0.96 (0.87-1.06)                               | 0.96 (0.83-1.10)                                | 0.44                                                      | 0.29                                                       |
| <b>All cancers</b>                                                                         |                                                |                                                |                                                 |                                                           |                                                            |
| Number of events                                                                           | 182                                            | 539                                            | 351                                             |                                                           |                                                            |
| Model 1                                                                                    | 1.05 (0.98-1.12)                               | <b>1.09 (1.05-1.13)</b>                        | <b>1.05 (1.01-1.10)</b>                         |                                                           |                                                            |
| Model 2                                                                                    | 1.05 (0.98-1.13)                               | <b>1.07 (1.03-1.11)</b>                        | <b>1.05 (1.01-1.10)</b>                         | 0.59                                                      | 0.99                                                       |
| <b>CVD and/or cancer</b><br>(Myocardial infarction, stroke, vascular mortality, or cancer) |                                                |                                                |                                                 |                                                           |                                                            |
| Number of events                                                                           | 360                                            | 1080                                           | 767                                             |                                                           |                                                            |
| Model 1                                                                                    | <b>1.07 (1.02-1.12)</b>                        | <b>1.09 (1.07-1.12)</b>                        | <b>1.08 (1.05-1.11)</b>                         |                                                           |                                                            |
| Model 2                                                                                    | <b>1.05 (1.00-1.11)</b>                        | <b>1.06 (1.03-1.09)</b>                        | <b>1.08 (1.05-1.11)</b>                         | 0.62                                                      | 0.47                                                       |

Model 1= Adjusted for age, sex; Model 2= Adjusted for age, sex, number of pack-years (for former and current smokers), body mass index, LDL cholesterol, diabetes mellitus, systolic blood pressure, and kidney function.  
CRP=C-reactive protein; HR=Hazard ratio; CI=Confidence interval; CVD=cardiovascular disease.

**Supplemental Table S7.** Relation between continuous CRP (1 mg/L higher) and cancer risk after exclusion of diagnosis within 1, 2, and 5 year(s) after inclusion in the cohort

|                                                                                            | <b>Exclusion cancer diagnoses<br/>&lt;1 year<br/>N=7076<br/>HR (95% CI)</b> | <b>Exclusion cancer diagnoses<br/>&lt;2 year<br/>N=6985<br/>HR (95% CI)</b> | <b>Exclusion cancer diagnoses<br/>&lt;5 year<br/>N=6701<br/>HR (95% CI)</b> |
|--------------------------------------------------------------------------------------------|-----------------------------------------------------------------------------|-----------------------------------------------------------------------------|-----------------------------------------------------------------------------|
| <b>Lung</b>                                                                                |                                                                             |                                                                             |                                                                             |
| Number of events                                                                           | 213                                                                         | 191                                                                         | 124                                                                         |
| Model 1                                                                                    | <b>1.19 (1.14-1.25)</b>                                                     | <b>1.20 (1.14-1.26)</b>                                                     | <b>1.19 (1.12-1.28)</b>                                                     |
| Model 2                                                                                    | <b>1.15 (1.09-1.21)</b>                                                     | <b>1.16 (1.09-1.23)</b>                                                     | <b>1.15 (1.07-1.23)</b>                                                     |
| <b>Colon/rectum</b>                                                                        |                                                                             |                                                                             |                                                                             |
| Number of events                                                                           | 159                                                                         | 144                                                                         | 106                                                                         |
| Model 1                                                                                    | 1.07 (1.00-1.14)                                                            | 1.05 (0.98-1.13)                                                            | 1.04 (0.95-1.13)                                                            |
| Model 2                                                                                    | 1.05 (0.98-1.12)                                                            | 1.04 (0.96-1.12)                                                            | 1.01 (0.92-1.11)                                                            |
| <b>Urinary tract</b>                                                                       |                                                                             |                                                                             |                                                                             |
| Number of events                                                                           | 83                                                                          | 78                                                                          | 50                                                                          |
| Model 1                                                                                    | <b>1.09 (1.00-1.19)</b>                                                     | <b>1.10 (1.00-1.20)</b>                                                     | 1.05 (0.93-1.18)                                                            |
| Model 2                                                                                    | 1.10 (0.998-1.20)                                                           | 1.10 (0.997-1.21)                                                           | 1.03 (0.91-1.18)                                                            |
| <b>Lymphoid/hematopoietic</b>                                                              |                                                                             |                                                                             |                                                                             |
| Number of events                                                                           | 74                                                                          | 64                                                                          | 43                                                                          |
| Model 1                                                                                    | 1.08 (0.98-1.19)                                                            | 1.06 (0.95-1.18)                                                            | 1.04 (0.91-1.19)                                                            |
| Model 2                                                                                    | 1.08 (0.98-1.20)                                                            | 1.08 (0.97-1.20)                                                            | 1.05 (0.91-1.21)                                                            |
| <b>Breast</b>                                                                              |                                                                             |                                                                             |                                                                             |
| Number of events/females                                                                   | 60/1800                                                                     | 58/1780                                                                     | 44/1712                                                                     |
| Model 1                                                                                    | 1.06 (0.96-1.17)                                                            | 1.08 (0.97-1.19)                                                            | 1.07 (0.95-1.20)                                                            |
| Model 2                                                                                    | 1.08 (0.98-1.20)                                                            | 1.10 (0.99-1.22)                                                            | 1.09 (0.97-1.23)                                                            |
| <b>Prostate</b>                                                                            |                                                                             |                                                                             |                                                                             |
| Number of events/males                                                                     | 171/5276                                                                    | 149/5205                                                                    | 92/4989                                                                     |
| Model 1                                                                                    | 0.96 (0.89-1.03)                                                            | 0.97 (0.90-1.05)                                                            | 0.91 (0.82-1.02)                                                            |
| Model 2                                                                                    | 0.96 (0.89-1.04)                                                            | 0.98 (0.90-1.06)                                                            | 0.93 (0.83-1.04)                                                            |
| <b>All cancers</b>                                                                         |                                                                             |                                                                             |                                                                             |
| Number of events                                                                           | 970                                                                         | 879                                                                         | 595                                                                         |
| Model 1                                                                                    | <b>1.08 (1.05-1.11)</b>                                                     | <b>1.07 (1.05-1.11)</b>                                                     | <b>1.06 (1.02-1.10)</b>                                                     |
| Model 2                                                                                    | <b>1.06 (1.03-1.09)</b>                                                     | <b>1.06 (1.03-1.09)</b>                                                     | <b>1.04 (1.00-1.08)</b>                                                     |
| <b>CVD and/or cancer</b><br>(Myocardial infarction, stroke, vascular mortality, or cancer) |                                                                             |                                                                             |                                                                             |
| Number of events                                                                           | 2078                                                                        | 1987                                                                        | 1703                                                                        |
| Model 1                                                                                    | <b>1.10 (1.08-1.12)</b>                                                     | <b>1.10 (1.08-1.12)</b>                                                     | <b>1.10 (1.08-1.12)</b>                                                     |
| Model 2                                                                                    | <b>1.07 (1.05-1.09)</b>                                                     | <b>1.07 (1.05-1.09)</b>                                                     | <b>1.07 (1.05-1.09)</b>                                                     |

Model 1= Adjusted for age, sex; Model 2= Adjusted for age, sex, smoking status, number of pack-years, body mass index, LDL cholesterol, diabetes mellitus, systolic blood pressure, and kidney function. CRP=C-reactive protein; HR=Hazard ratio; CI=Confidence interval; CVD=cardiovascular disease.

**Supplemental Table S8.** Relation between continuous CRP (1 mg/L higher) and cancer risk stratified for cardiovascular disease at baseline

|                                                                                           | <b>Coronary artery disease (CAD)</b> | <b>Cerebrovascular disease (CeVD)</b> | <b>Peripheral vascular disease (PAD)</b> | <b>P-value for interaction</b> | <b>P-value for interaction</b> |
|-------------------------------------------------------------------------------------------|--------------------------------------|---------------------------------------|------------------------------------------|--------------------------------|--------------------------------|
|                                                                                           | N= 3931<br>HR (95% CI)               | N=1904<br>HR (95% CI)                 | N=1343<br>HR (95% CI)                    | CeVD vs CAD                    | PAD vs CAD                     |
| <b>Lung</b>                                                                               |                                      |                                       |                                          |                                |                                |
| Number of events                                                                          | 89                                   | 49                                    | 88                                       |                                |                                |
| Model 1                                                                                   | <b>1.30 (1.20-1.40)</b>              | <b>1.16 (1.04-1.30)</b>               | 1.06 (0.98-1.15)                         |                                |                                |
| Model 2                                                                                   | <b>1.28 (1.18-1.38)</b>              | <b>1.16 (1.03-1.31)</b>               | 1.04 (0.95-1.13)                         | 0.13                           | 0.56                           |
| <b>Colon/rectum</b>                                                                       |                                      |                                       |                                          |                                |                                |
| Number of events                                                                          | 98                                   | 46                                    | 33                                       |                                |                                |
| Model 1                                                                                   | 1.08 (0.99-1.19)                     | 1.10 (0.98-1.24)                      | 1.03 (0.90-1.18)                         |                                |                                |
| Model 2                                                                                   | 1.04 (0.94-1.15)                     | 1.09 (0.96-1.23)                      | 1.04 (0.91-1.19)                         | 0.97                           | 0.20                           |
| <b>Urinary tract</b>                                                                      |                                      |                                       |                                          |                                |                                |
| Number of events                                                                          | 53                                   | 23                                    | 31                                       |                                |                                |
| Model 1                                                                                   | 1.08 (0.95-1.22)                     | 1.10 (0.93-1.30)                      | 1.07 (0.93-1.22)                         |                                |                                |
| Model 2                                                                                   | 1.10 (0.96-1.25)                     | 1.05 (0.87-1.26)                      | 1.06 (0.93-1.22)                         | 0.98                           | 0.30                           |
| <b>Lymphoid/hematopoietic</b>                                                             |                                      |                                       |                                          |                                |                                |
| Number of events                                                                          | 42                                   | 15                                    | 25                                       |                                |                                |
| Model 1                                                                                   | 1.07 (0.93-1.23)                     | 0.95 (0.75-1.22)                      | <b>1.17 (1.02-1.35)</b>                  |                                |                                |
| Model 2                                                                                   | 1.10 (0.95-1.27)                     | 0.97 (0.75-1.25)                      | <b>1.16 (1.00-1.34)</b>                  | 0.21                           | 0.17                           |
| <b>Breast</b>                                                                             |                                      |                                       |                                          |                                |                                |
| Number of events/females                                                                  | 31/728                               | 21/720                                | 17/380                                   |                                |                                |
| Model 1                                                                                   | 1.08 (0.93-1.26)                     | 1.05 (0.88-1.25)                      | 0.94 (0.77-1.14)                         |                                |                                |
| Model 2                                                                                   | 1.07 (0.90-1.26)                     | 1.05 (0.88-1.27)                      | 0.96 (0.79-1.18)                         | 0.45                           | 0.75                           |
| <b>Prostate</b>                                                                           |                                      |                                       |                                          |                                |                                |
| Number of events/males                                                                    | 110/3203                             | 47/1184                               | 31/963                                   |                                |                                |
| Model 1                                                                                   | 0.95 (0.86-1.06)                     | 1.01 (0.89-1.15)                      | 0.91 (0.78-1.07)                         |                                |                                |
| Model 2                                                                                   | 0.97 (0.87-1.08)                     | 1.01 (0.88-1.17)                      | 0.89 (0.76-1.05)                         | 0.65                           | 0.21                           |
| <b>All cancers</b>                                                                        |                                      |                                       |                                          |                                |                                |
| Number of events                                                                          | 540                                  | 261                                   | 271                                      |                                |                                |
| Model 1                                                                                   | <b>1.10 (1.05-1.14)</b>              | <b>1.06 (1.01-1.12)</b>               | 1.05 (1.00-1.10)                         |                                |                                |
| Model 2                                                                                   | <b>1.08 (1.04-1.13)</b>              | <b>1.06 (1.00-1.12)</b>               | 1.04 (0.99-1.09)                         | 0.39                           | 0.99                           |
| <b>CVD and/or cancer</b><br>(Myocardial infarction, stroke, vascular mortality or cancer) |                                      |                                       |                                          |                                |                                |
| Number of events                                                                          | 1053                                 | 546                                   | 591                                      |                                |                                |
| Model 1                                                                                   | <b>1.11 (1.08-1.14)</b>              | <b>1.08 (1.05-1.12)</b>               | <b>1.07 (1.03-1.10)</b>                  |                                |                                |
| Model 2                                                                                   | <b>1.08 (1.05-1.11)</b>              | <b>1.06 (1.02-1.10)</b>               | <b>1.06 (1.03-1.09)</b>                  | 0.97                           | 0.17                           |

Model 1= Adjusted for age, sex; Model 2= Adjusted for age, sex, number of pack-years, smoking status, body mass index, LDL cholesterol, diabetes mellitus, systolic blood pressure, and kidney function. CRP=C-reactive protein; HR=Hazard ratio; CI=confidence interval; CVD=cardiovascular disease.

**Supplemental Figure S3** Survival curves in CRP quintiles for recurrent cardiovascular disease, combined endpoint, total cancer, and lung cancer (only patients with CRP concentration  $\leq 5$  mg/L)

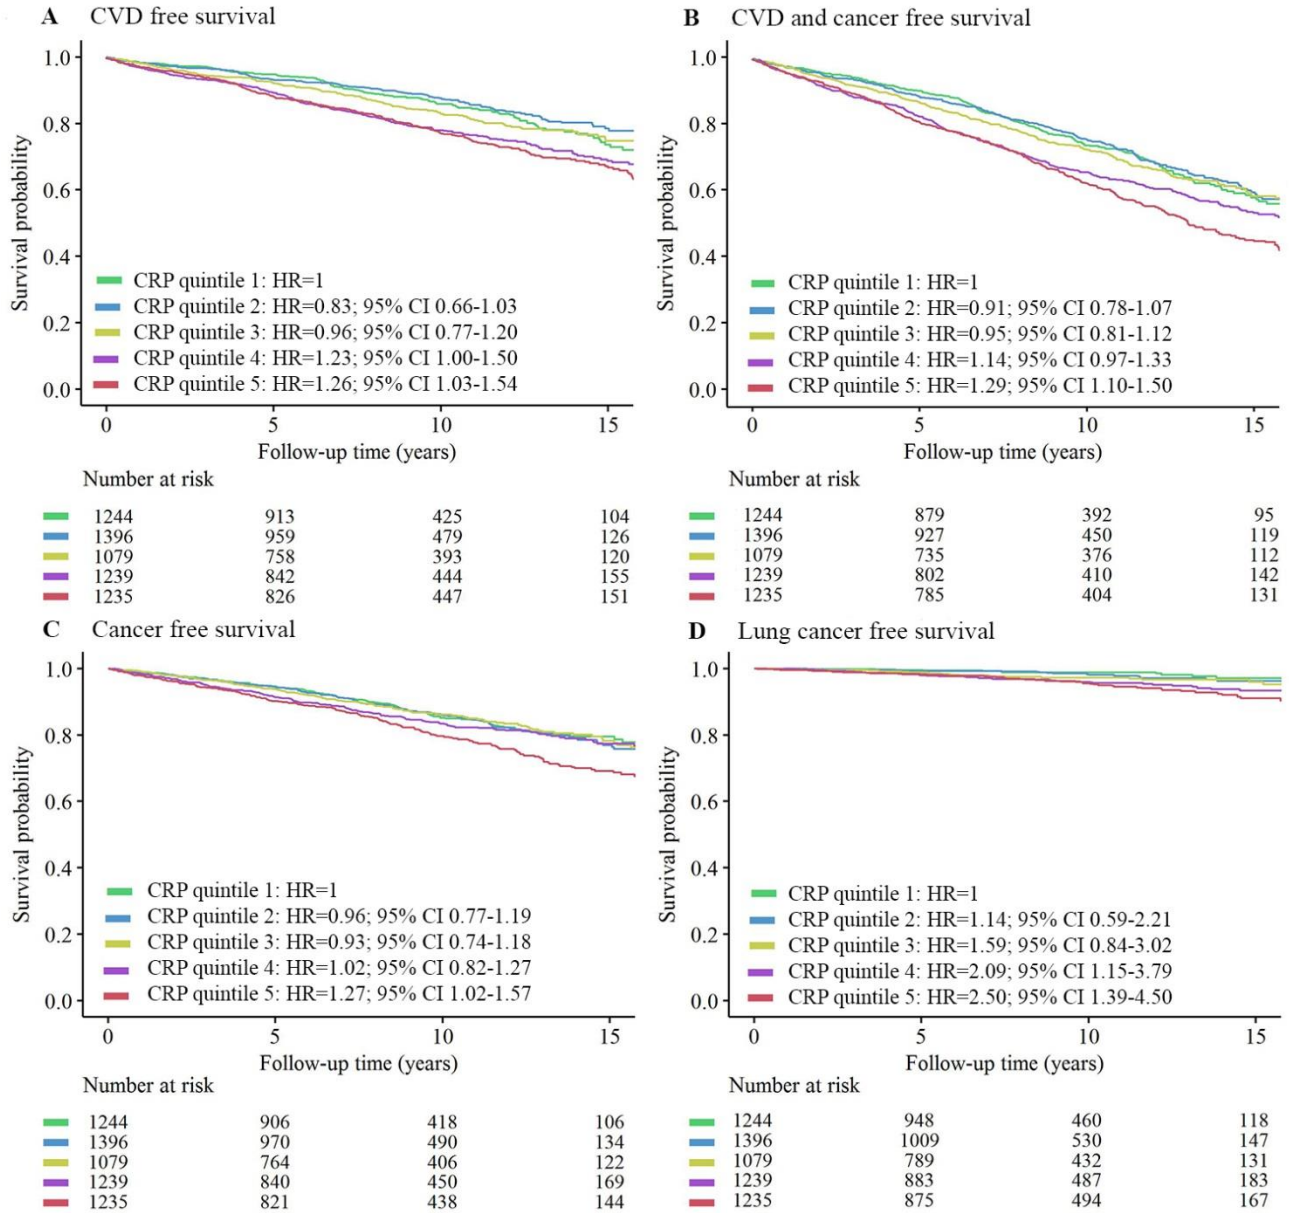

Hazard ratios are adjusted for age, sex, body mass index, smoking status, pack-years of smoking, LDL cholesterol, diabetes mellitus, systolic blood pressure, and kidney function. Quintile 1: CRP 0.49 (range 0.10-0.64); Quintile 2: CRP 0.90 (range 0.64-1.20); Quintile 3: CRP 1.50 (range 1.20-1.85); Quintile 4: CRP 2.35 (range 1.85-2.98); Quintile 5: CRP 3.80 (range 2.98-5.00).

**Supplemental Figure S4.** Relation between CRP and incident cancer, according to anatomical location of origin (only patients with CRP concentration  $\leq 5$  mg/L)

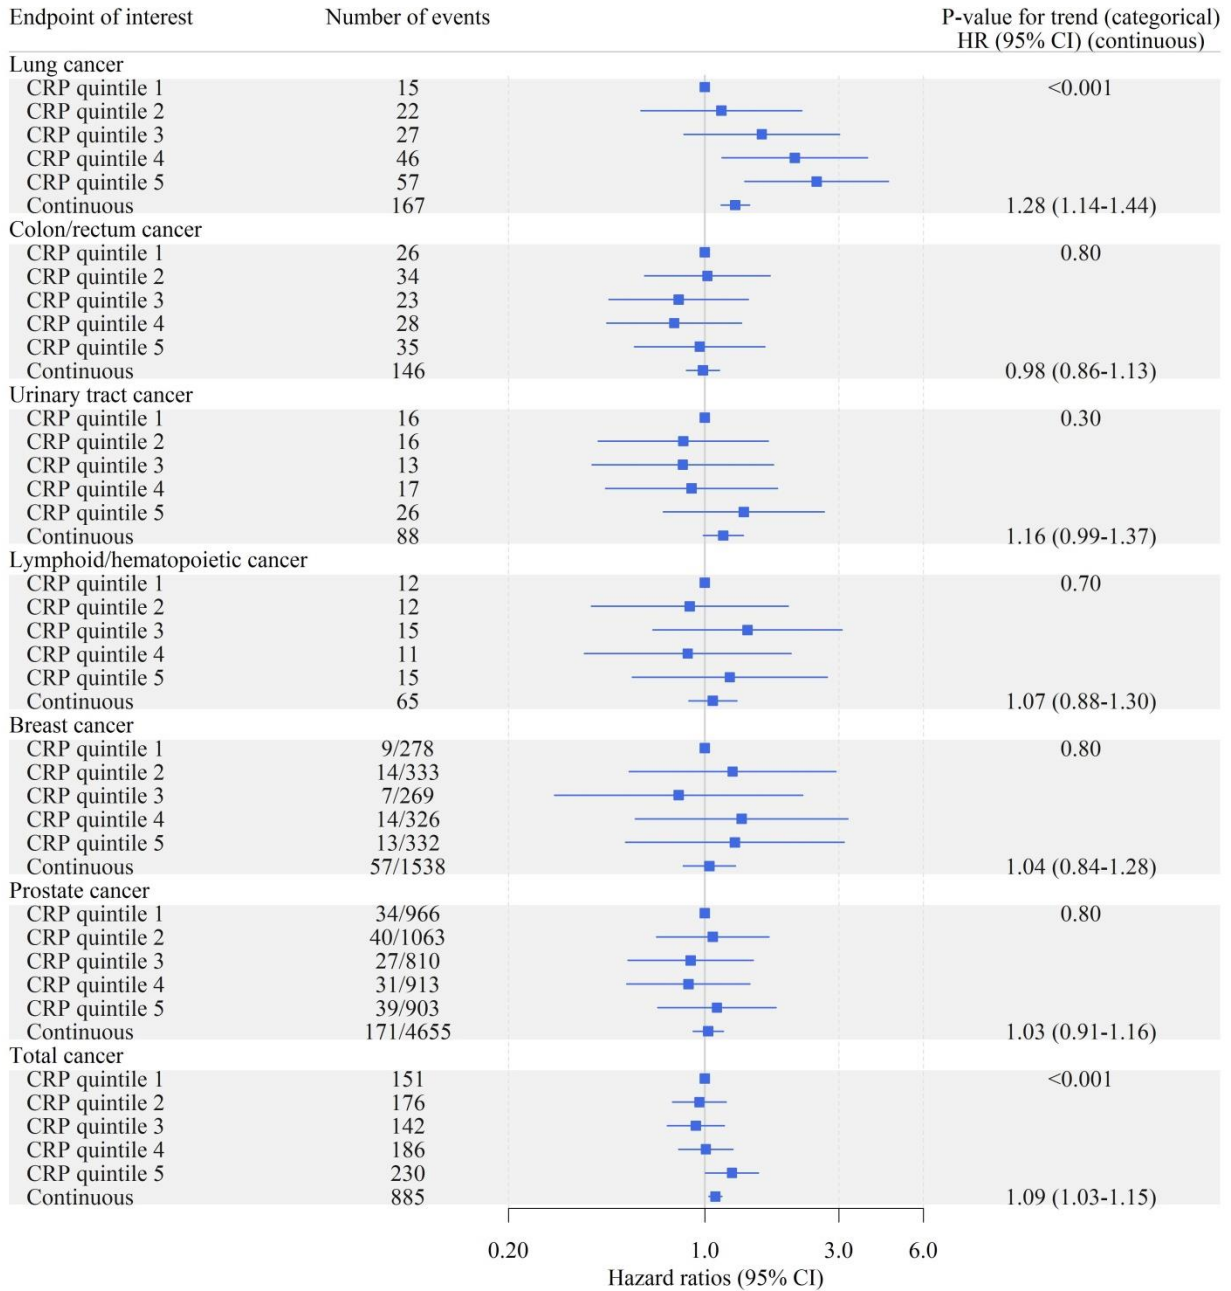

Hazard ratios are adjusted for age, sex, smoking status, number of pack-years, body mass index, LDL cholesterol, diabetes mellitus, systolic blood pressure, and kidney function. Analyses for breast and prostate cancer were performed in subgroups of women and men respectively. Number of events per number of women or men in CRP quintiles are given. Continuous analyses represent hazard ratios per 1 mg/L higher CRP concentration. Quintile 1: CRP 0.49 (range 0.10-0.64); Quintile 2: CRP 0.90 (range 0.64-1.20); Quintile 3: CRP 1.50 (range 1.20-1.85); Quintile 4: CRP 2.35 (range 1.85-2.98); Quintile 5: CRP 3.80 (range 2.98-5.00).
